# Supplementary material for: Nickel doped nanohydroxyapatite: vascular endothelial growth factor inducing biomaterial for bone tissue engineering
Source: Royal Society of Chemistry journal article supplement (doi:10.1039/c5ra09560c), 2015-01-01
Supplement: c5ra09560c1.pdf [file c5ra09560c1.pdf]

## Supplementary Data

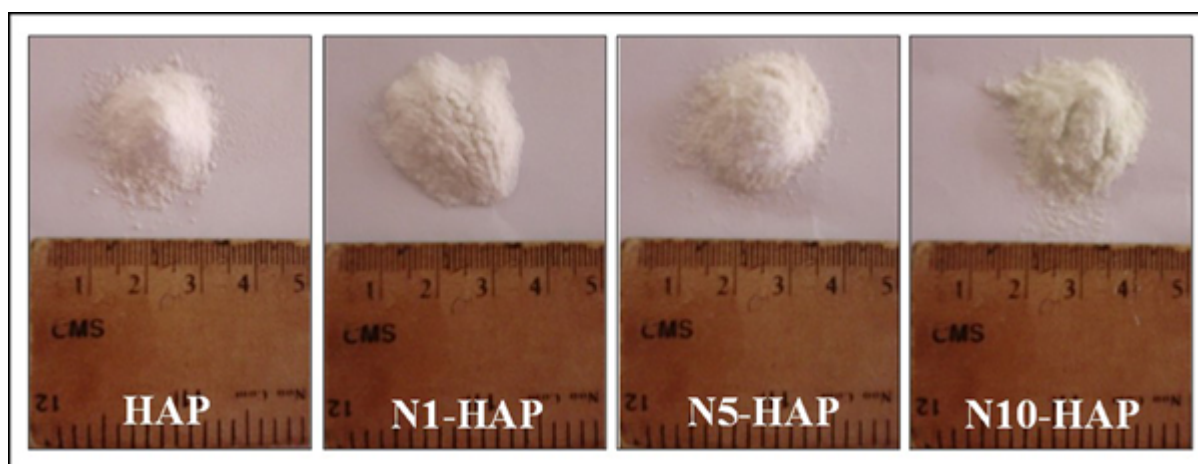

Fig.S1. nHAp and Ni<sup>+2</sup> doped nHAp prepared by ammoniacal precipitation method.
